# Supplementary material for: Controllable ZnO architectures with the assistance of ethanolamine and their application for removing divalent heavy metals (Cu, Pb, Ni) from water
Source: Royal Society of Chemistry journal article supplement (doi:10.1039/c7nj04669c), 2018-01-01
Supplement: c7nj04669c1.pdf [file c7nj04669c1.pdf]

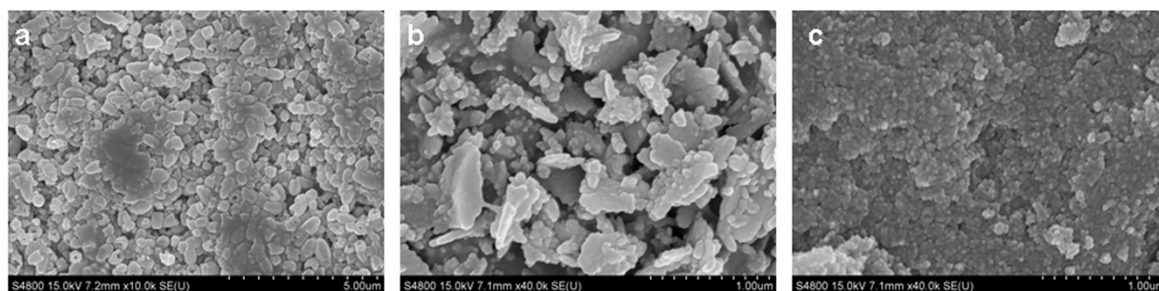

**Fig. S1.** FESEM images of ZnO samples prepared without the addition of ethanolamine: Zn<sup>2+</sup>/NaOH 1:2 (a), Zn<sup>2+</sup>/NaOH 1:8 (b), Zn<sup>2+</sup>/NaOH 1:2 and ethanol as solvent (c).

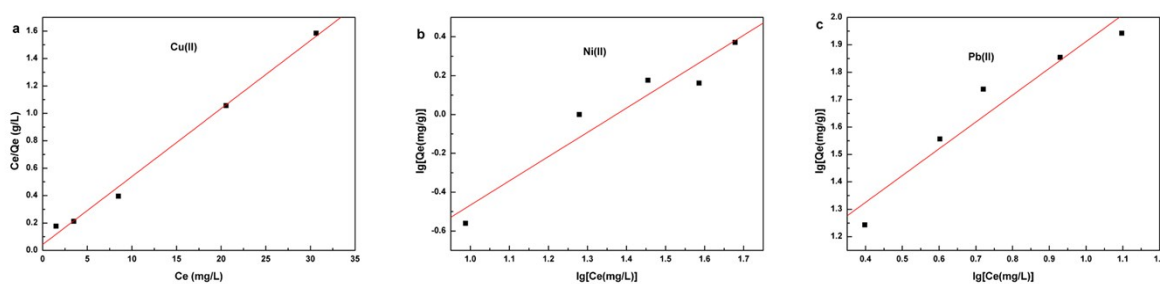

**Fig. S2.** Adsorption isotherms of commercial ZnO for removal of Cu(II) ions (a), Ni(II) ions (b), Pb(II) ions (c).

**Table S1.** Adsorption capacity of commercial ZnO for the adsorption of divalent heavy metals.

| Sorbent        | Sorbate               |                       |                       |
|----------------|-----------------------|-----------------------|-----------------------|
|                | Cu <sup>2+</sup>      | Ni <sup>2+</sup>      | Pb <sup>2+</sup>      |
|                | Q <sub>m</sub> (mg/g) | K <sub>F</sub> (mg/g) | K <sub>F</sub> (mg/g) |
| commercial ZnO | 20.0                  | 0.02                  | 8.6                   |
